# Supplementary material for: Diffusion-Weighted Magnetic Resonance Imaging in Hepatocellular Carcinoma as a Predictor of a Response to Cisplatin-Based Hepatic Arterial Infusion Chemotherapy
Source: PubMed Central journal article supplement (PMC7711158; doi:10.3389/fonc.2020.600233), 2020-11-19

## Supplementary Figure 1

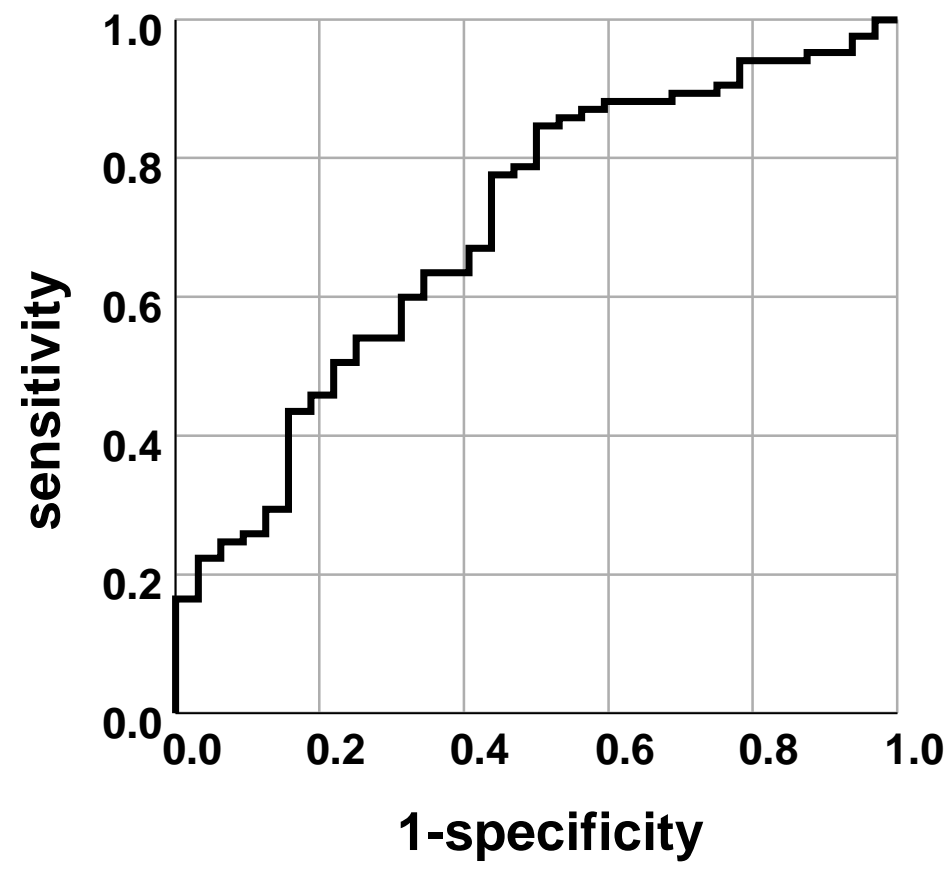

AUROC: 0.704

Cutoff value of tumor-to-liver ADC: 0.741

## Supplementary Figure 2

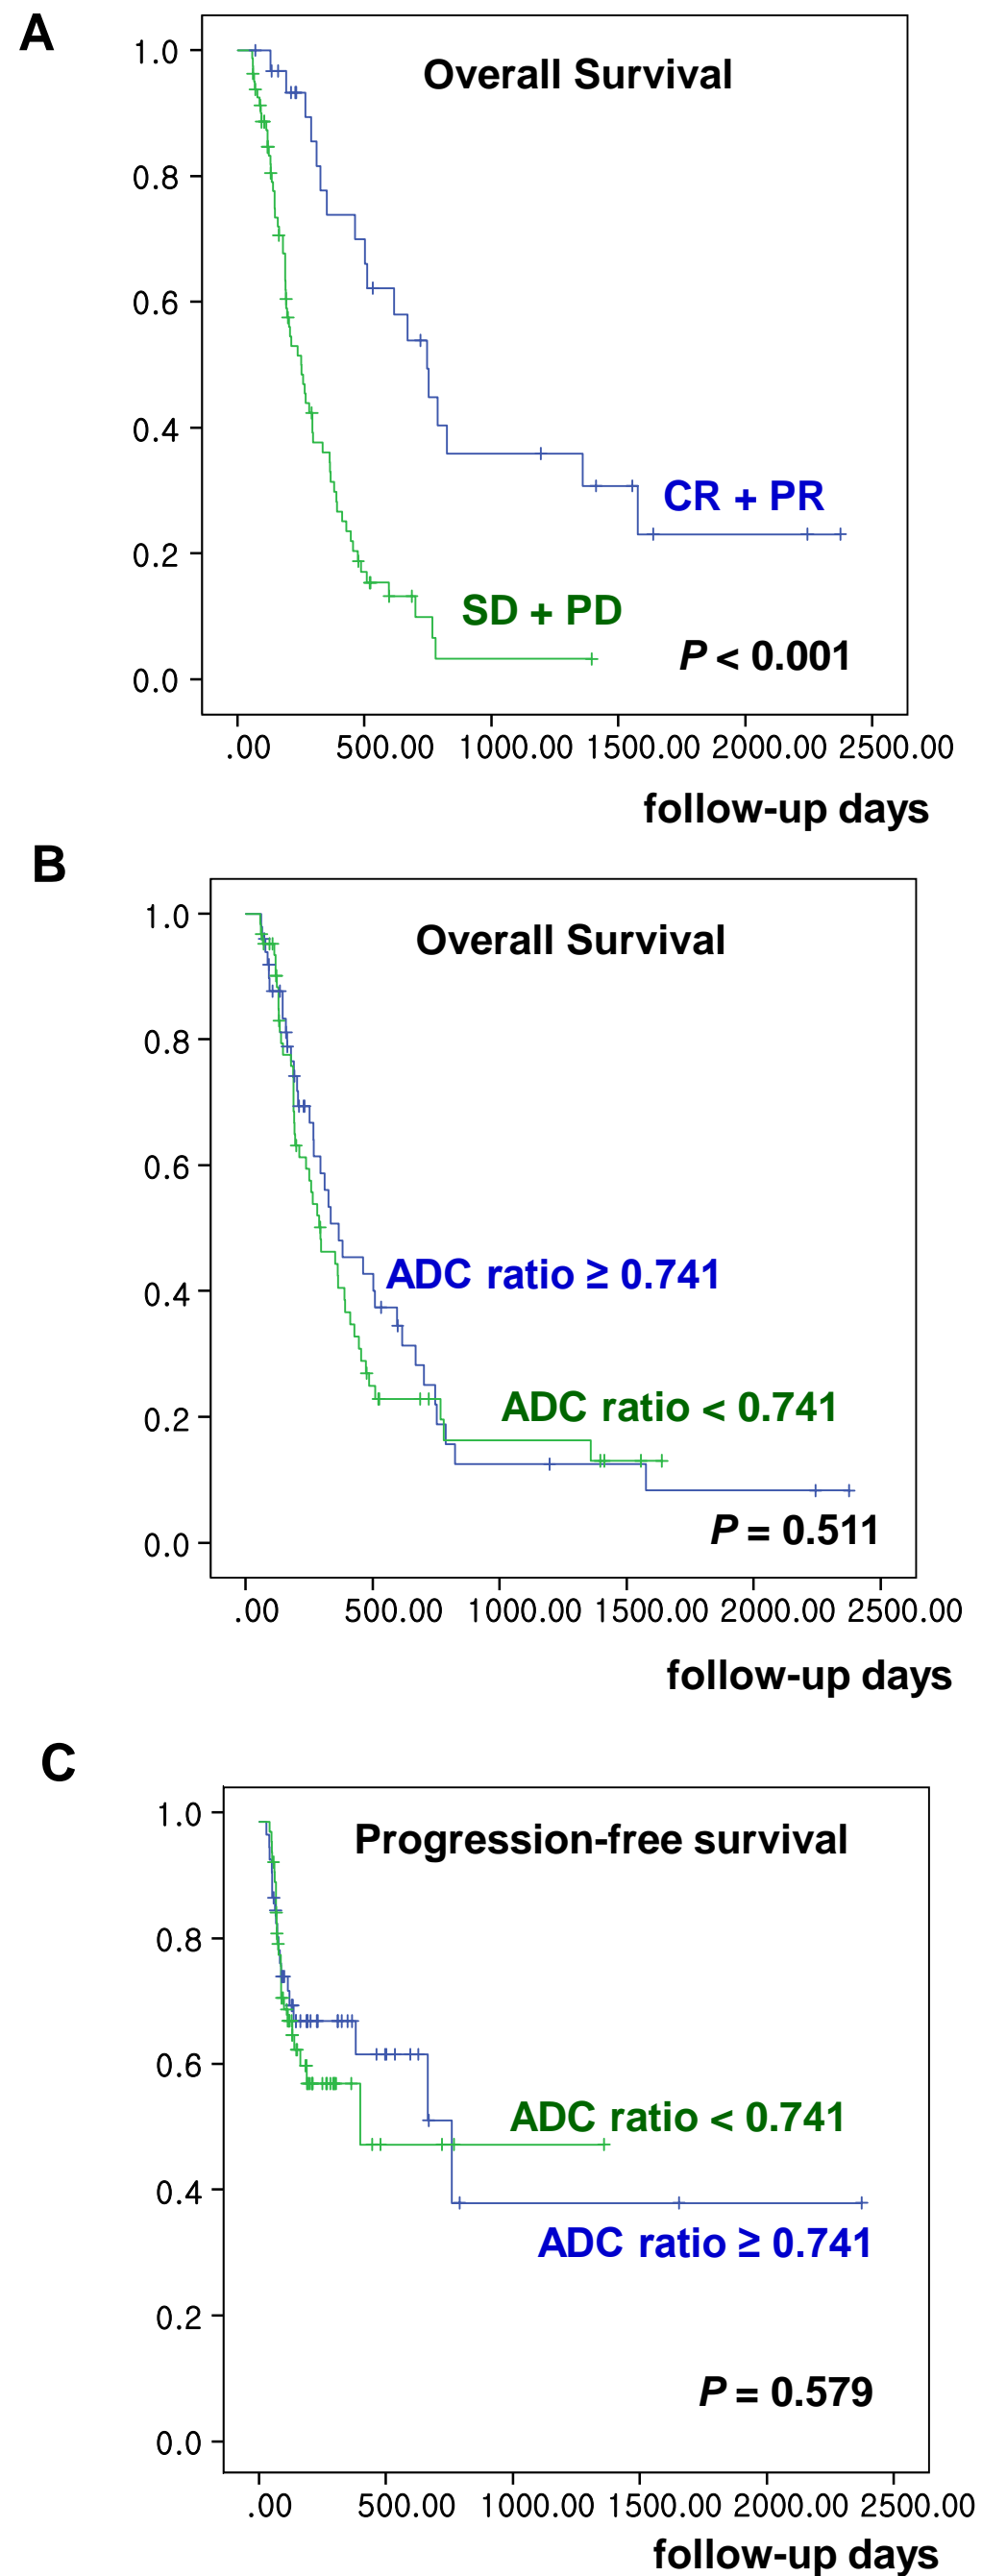

Supplement: DataSheet_1.pdf [file DataSheet_1.pdf]
